# Supplementary material
Source: HighWire-hosted journal article supplement (https://diabetes.diabetesjournals.org/content/suppl/2010/09/13/db10-0273)
Supplement: db100273onlineappendix.pdf [file db100273onlineappendix.pdf]

**Online Appendix Table 1. Body mass index reference for screening overweight and obesity in Chinese children and adolescents <sup>1</sup> (kg/m<sup>2</sup>)**

| Age (year) | Boys       |       | Girls      |       |
|------------|------------|-------|------------|-------|
|            | Overweight | Obese | Overweight | Obese |
| 6          | 16.8       | 18.4  | 16.7       | 18.4  |
| 7          | 17.4       | 19.2  | 17.2       | 18.9  |
| 8          | 18.1       | 20.3  | 18.1       | 19.9  |
| 9          | 18.9       | 21.4  | 19.0       | 21.0  |
| 10         | 19.6       | 22.5  | 20.0       | 22.1  |
| 11         | 20.3       | 23.6  | 21.1       | 23.3  |
| 12         | 21.0       | 24.7  | 21.9       | 24.5  |
| 13         | 21.9       | 25.7  | 22.6       | 25.6  |
| 14         | 22.6       | 26.4  | 23.0       | 26.3  |
| 15         | 23.1       | 26.9  | 23.4       | 26.9  |
| 16         | 23.5       | 27.4  | 23.7       | 27.4  |
| 17         | 23.8       | 27.8  | 23.8       | 27.7  |
| 18         | 24.0       | 28.0  | 24.0       | 28.0  |

1. Ji CY; Working Group on Obesity in China. Report on childhood obesity in China (1)--body mass index reference for screening overweight and obesity in Chinese school-age children. *Biomed Environ Sci*.18:390-400, 2005

**Online Appendix Table 2. Basic characteristics of participants in this study**

|                          | All       | Obese     | Overweight | Normal weight | P Value |
|--------------------------|-----------|-----------|------------|---------------|---------|
| <i>n</i>                 | 3503      | 1229      | 655        | 1619          |         |
| Boys (%)                 | 50.8      | 64.0      | 50.1       | 41.2          | <0.001  |
| Age (years)              | 12.4±3.1  | 11.8±2.9  | 13.3±3     | 12.5±3.2      | <0.001  |
| BMI (kg/m <sup>2</sup> ) | 21.9±4.9  | 26.5±3.7  | 23.4±2.5   | 17.8±2.4      | <0.001  |
| Waist circumference (cm) | 72.4±13.1 | 83.7±10.9 | 76.1±7.9   | 62.3±7.2      | <0.001  |
| Waist-to-height ratio    | 0.47±0.07 | 0.55±0.05 | 0.49±0.03  | 0.42±0.03     | <0.001  |
| Fat mass percentage      | 24.4±8.5  | 30.9±6.7  | 27.8±6.2   | 18.1±5.6      | <0.001  |
| Birth weight (g)         | 3355±525  | 3423±516  | 3348±554   | 3304±513      | <0.001  |

Categorical data were expressed as percentage and differences between groups were assessed by the Chi-square test; continuous variables were expressed as mean ± SD and were assessed by ANOVA test. Obese, overweight, and normal weight children were diagnosed by the Chinese age- and sex-specific BMI cutoffs (online appendix Table 1) (Reference: Ji CY; Working Group on Obesity in China: Report on childhood obesity in China (1)--body mass index reference for screening overweight and obesity in Chinese school-age children. *Biomed Environ Sci* 18:390-400, 2005).

**Online Appendix Table 3. The genotyping results of six SNPs (rs7138803, rs1805081, rs6499640, rs17782313, rs6265, and rs10938397)**

| SNP        | Chr. | Nearest gene  | Effect allele (1) | Other allele (2) | EAF* (Obese) | EAF* (Overweight) | EAF* (Normal weight) | EAF* in HapMap-CEU | Genotype count   |                     |                       |                     |                          |                     |
|------------|------|---------------|-------------------|------------------|--------------|-------------------|----------------------|--------------------|------------------|---------------------|-----------------------|---------------------|--------------------------|---------------------|
|            |      |               |                   |                  |              |                   |                      |                    | Obese (11/12/22) | $P_{H-w}^{\dagger}$ | Overweight (11/12/22) | $P_{H-w}^{\dagger}$ | Normal weight (11/12/22) | $P_{H-w}^{\dagger}$ |
| rs7138803  | 12   | <i>FAIM2</i>  | A                 | G                | 0.304        | 0.302             | 0.280                | 0.442              | 111/513/585      | 0.923               | 67/258/323            | 0.151               | 127/635/828              | 0.733               |
| rs1805081  | 18   | <i>NPCI</i>   | A                 | G                | 0.784        | 0.755             | 0.765                | 0.533              | 745/395/63       | 0.263               | 371/234/41            | 0.616               | 938/552/96               | 0.221               |
| rs6499640  | 16   | <i>FTO</i>    | A                 | G                | 0.182        | 0.162             | 0.158                | 0.650              | 45/350/813       | 0.340               | 20/169/458            | 0.365               | 45/413/1130              | 0.331               |
| rs17782313 | 18   | <i>MC4R</i>   | C                 | T                | 0.259        | 0.246             | 0.207                | 0.283              | 87/452/668       | 0.382               | 38/243/367            | 0.789               | 61/535/993               | 0.290               |
| rs6265     | 11   | <i>BDNF</i>   | G                 | A                | 0.555        | 0.534             | 0.519                | 0.825              | 369/604/237      | 0.718               | 185/322/141           | 0.968               | 417/818/355              | 0.224               |
| rs10938397 | 4    | <i>GNPDA2</i> | G                 | A                | 0.351        | 0.330             | 0.304                | 0.446              | 154/541/514      | 0.532               | 75/277/295            | 0.419               | 147/670/768              | 0.960               |

Obese, overweight, and normal weight children were diagnosed by the Chinese age- and sex-specific BMI cutoffs (online appendix Table 1) (Reference: Ji CY; Working Group on Obesity in China: Report on childhood obesity in China (1)--body mass index reference for screening overweight and obesity in Chinese school-age children. *Biomed Environ Sci* 18:390-400, 2005). \*EAF indicates effect allele frequency.  $\dagger P_{H-w}$  indicates  $P$  value for Hardy–Weinberg equilibrium.

**Online Appendix Table 4. Associations of six SNPs (rs7138803, rs1805081, rs6499640, rs17782313, rs6265, and rs10938397) with BMI under different genetic models after age and sex adjustment**

| SNP        | Position | Nearest gene  | Effect allele | Other allele | $P$ Value (Dominant model) |                      | $P$ Value (Additive model) |                      | $P$ Value (Recessive model) |                    |
|------------|----------|---------------|---------------|--------------|----------------------------|----------------------|----------------------------|----------------------|-----------------------------|--------------------|
|            |          |               |               |              | Nominal $P$ Value          | Permuted $P$ Value   | Nominal $P$ Value          | Permuted $P$ Value   | Nominal $P$ Value           | Permuted $P$ Value |
|            |          |               |               |              | rs7138803                  | 48533735             | <i>FAIM2</i>               | A                    | G                           | 0.0036             |
| rs1805081  | 19394430 | <i>NPCI</i>   | A             | G            | 0.12                       | 0.41                 | 0.063                      | 0.28                 | 0.065                       | 0.28               |
| rs6499640  | 52327178 | <i>FTO</i>    | A             | G            | 0.016                      | 0.086                | 0.023                      | 0.12                 | 0.33                        | 0.50               |
| rs17782313 | 56002077 | <i>MC4R</i>   | C             | T            | $8.7 \times 10^{-6}$       | $5.5 \times 10^{-5}$ | $3.6 \times 10^{-7}$       | $1.0 \times 10^{-5}$ | $9.2 \times 10^{-5}$        | 0.00061            |
| rs6265     | 27636492 | <i>BDNF</i>   | G             | A            | 0.014                      | 0.076                | 0.0067                     | 0.038                | 0.035                       | 0.18               |
| rs10938397 | 45023455 | <i>GNPDA2</i> | G             | A            | 0.0020                     | 0.012                | 0.00016                    | 0.00093              | 0.00099                     | 0.0058             |

Nominal  $P$  Values were adjusted for age and sex, and permuted  $P$  Values were further corrected for multiple testing. All  $P$  values were one-sided.

**Online Appendix Table 5A. Associations of six SNPs (rs7138803, rs1805081, rs6499640, rs17782313, rs6265, and rs10938397) with waist circumference after age and sex adjustment**

| SNP        | Position | Nearest gene  | Effect allele (1) | Other allele (2) | Waist circumference, cm (mean±SE) |          |          | Per effect allele change in waist circumference (β) | Lower bound of one-sided 95% CI |
|------------|----------|---------------|-------------------|------------------|-----------------------------------|----------|----------|-----------------------------------------------------|---------------------------------|
|            |          |               |                   |                  | 11                                | 12       | 22       |                                                     |                                 |
| rs7138803  | 48533735 | <i>FAIM2</i>  | A                 | G                | 73.5±0.6                          | 72.8±0.3 | 71.8±0.3 | 0.87                                                | 0.38                            |
| rs1805081  | 19394430 | <i>NPC1</i>   | A                 | G                | 72.5±0.2                          | 72.3±0.3 | 71.0±0.8 | 0.45                                                | -0.077                          |
| rs6499640  | 52327178 | <i>FTO</i>    | A                 | G                | 72.9±1.1                          | 72.8±0.4 | 72.2±0.2 | 0.56                                                | -0.028                          |
| rs17782313 | 56002077 | <i>MC4R</i>   | C                 | T                | 75.2±0.8                          | 73.1±0.3 | 71.6±0.2 | 1.60                                                | 1.07                            |
| rs6265     | 27636492 | <i>BDNF</i>   | G                 | A                | 72.9±0.4                          | 72.2±0.3 | 71.9±0.4 | 0.50                                                | 0.052                           |
| rs10938397 | 45023455 | <i>GNPDA2</i> | G                 | A                | 73.9±0.6                          | 72.7±0.3 | 71.7±0.3 | 1.06                                                | 0.59                            |

| SNP        | <i>P</i> Value (Dominant model) |                         | <i>P</i> Value (Additive model) |                         | <i>P</i> Value (Recessive model) |                         |
|------------|---------------------------------|-------------------------|---------------------------------|-------------------------|----------------------------------|-------------------------|
|            | Nominal <i>P</i> Value          | Permuted <i>P</i> Value | Nominal <i>P</i> Value          | Permuted <i>P</i> Value | Nominal <i>P</i> Value           | Permuted <i>P</i> Value |
| rs7138803  | 0.0038                          | 0.022                   | 0.0021                          | 0.012                   | 0.032                            | 0.16                    |
| rs1805081  | 0.17                            | 0.46                    | 0.082                           | 0.33                    | 0.059                            | 0.26                    |
| rs6499640  | 0.035                           | 0.18                    | 0.048                           | 0.23                    | 0.37                             | 0.50                    |
| rs17782313 | 3.6×10 <sup>-6</sup>            | 1.0×10 <sup>-5</sup>    | 2.3×10 <sup>-7</sup>            | 1.0×10 <sup>-5</sup>    | 0.00019                          | 0.0010                  |
| rs6265     | 0.047                           | 0.22                    | 0.039                           | 0.19                    | 0.12                             | 0.40                    |
| rs10938397 | 0.0020                          | 0.012                   | 0.00030                         | 0.0018                  | 0.0030                           | 0.018                   |

Nominal *P* Values were adjusted for age and sex, and permuted *P* Values were further corrected for multiple testing. All *P* values and 95% CIs were one-sided. ANCOVA was applied for comparison of waist circumference between genotypes of SNPs, and linear regression was used to estimate the effect of per allele on waist circumference.

**Online Appendix Table 5B. Associations of six SNPs (rs7138803, rs1805081, rs6499640, rs17782313, rs6265, and rs10938397) with waist-to-height ratio after age and sex adjustment**

| SNP        | Position | Nearest gene  | Effect allele (1) | Other allele (2) | Waist-to-height ratio (mean±SE) |             |             | Per effect allele change in waist-to-height ratio (β) | Lower bound of one-sided 95% CI |
|------------|----------|---------------|-------------------|------------------|---------------------------------|-------------|-------------|-------------------------------------------------------|---------------------------------|
|            |          |               |                   |                  | 11                              | 12          | 22          |                                                       |                                 |
| rs7138803  | 48533735 | <i>FAIM2</i>  | A                 | G                | 0.481±0.004                     | 0.477±0.002 | 0.471±0.002 | 0.0050                                                | 0.0024                          |
| rs1805081  | 19394430 | <i>NPC1</i>   | A                 | G                | 0.476±0.001                     | 0.475±0.002 | 0.467±0.005 | 0.0030                                                | -0.00045                        |
| rs6499640  | 52327178 | <i>FTO</i>    | A                 | G                | 0.474±0.006                     | 0.479±0.002 | 0.473±0.001 | 0.0030                                                | -7.7×10 <sup>-6</sup>           |
| rs17782313 | 56002077 | <i>MC4R</i>   | C                 | T                | 0.491±0.005                     | 0.479±0.002 | 0.471±0.001 | 0.0090                                                | 0.0060                          |
| rs6265     | 27636492 | <i>BDNF</i>   | G                 | A                | 0.478±0.002                     | 0.474±0.002 | 0.472±0.002 | 0.0030                                                | 0.00013                         |
| rs10938397 | 45023455 | <i>GNPDA2</i> | G                 | A                | 0.485±0.003                     | 0.477±0.002 | 0.471±0.002 | 0.0070                                                | 0.0040                          |

| SNP        | <i>P</i> Value (Dominant model) |                         | <i>P</i> Value (Additive model) |                         | <i>P</i> Value (Recessive model) |                         |
|------------|---------------------------------|-------------------------|---------------------------------|-------------------------|----------------------------------|-------------------------|
|            | Nominal <i>P</i> Value          | Permuted <i>P</i> Value | Nominal <i>P</i> Value          | Permuted <i>P</i> Value | Nominal <i>P</i> Value           | Permuted <i>P</i> Value |
| rs7138803  | 0.0023                          | 0.014                   | 0.0014                          | 0.0078                  | 0.033                            | 0.17                    |
| rs1805081  | 0.18                            | 0.47                    | 0.092                           | 0.35                    | 0.066                            | 0.28                    |
| rs6499640  | 0.016                           | 0.087                   | 0.038                           | 0.19                    | 0.42                             | 0.50                    |
| rs17782313 | 1.1×10 <sup>-5</sup>            | 6.0×10 <sup>-5</sup>    | 1.0×10 <sup>-6</sup>            | 5.0×10 <sup>-6</sup>    | 0.00045                          | 0.0026                  |
| rs6265     | 0.045                           | 0.22                    | 0.035                           | 0.18                    | 0.11                             | 0.38                    |
| rs10938397 | 0.00083                         | 0.0050                  | 0.00012                         | 0.00063                 | 0.0022                           | 0.013                   |

Nominal *P* Values were adjusted for age and sex, and permuted *P* Values were further corrected for multiple testing. All *P* values and 95% CIs were one-sided. ANCOVA was applied for comparison of waist-to-height ratio between genotypes of SNPs, and linear regression was used to estimate the effect of per allele on waist-to-height ratio.

**Online Appendix Table 5C. Associations of six SNPs (rs7138803, rs1805081, rs6499640, rs17782313, rs6265, and rs10938397) with fat mass percentage after age and sex adjustment**

| SNP        | Position | Nearest gene  | Effect allele (1) | Other allele (2) | Fat mass percentage, % (mean±SE) |          |          | Per effect allele change in fat mass percentage ( $\beta$ ) | Lower bound of one-sided 95% CI |
|------------|----------|---------------|-------------------|------------------|----------------------------------|----------|----------|-------------------------------------------------------------|---------------------------------|
|            |          |               |                   |                  | 11                               | 12       | 22       |                                                             |                                 |
| rs7138803  | 48533735 | <i>FAIM2</i>  | A                 | G                | 25.4±0.5                         | 24.5±0.2 | 24.1±0.2 | 0.57                                                        | 0.22                            |
| rs1805081  | 19394430 | <i>NPC1</i>   | A                 | G                | 24.4±0.2                         | 24.5±0.2 | 23.3±0.6 | 0.26                                                        | -0.12                           |
| rs6499640  | 52327178 | <i>FTO</i>    | A                 | G                | 24.5±0.8                         | 24.8±0.3 | 24.2±0.2 | 0.41                                                        | -0.019                          |
| rs17782313 | 56002077 | <i>MC4R</i>   | C                 | T                | 26.0±0.6                         | 24.9±0.2 | 23.9±0.2 | 0.99                                                        | 0.61                            |
| rs6265     | 27636492 | <i>BDNF</i>   | G                 | A                | 24.6±0.3                         | 24.5±0.2 | 23.8±0.3 | 0.38                                                        | 0.050                           |
| rs10938397 | 45023455 | <i>GNPDA2</i> | G                 | A                | 25.4±0.4                         | 24.6±0.2 | 23.9±0.2 | 0.74                                                        | 0.39                            |

| SNP        | <i>P</i> Value (Dominant model) |                         | <i>P</i> Value (Additive model) |                         | <i>P</i> Value (Recessive model) |                         |
|------------|---------------------------------|-------------------------|---------------------------------|-------------------------|----------------------------------|-------------------------|
|            | Nominal <i>P</i> Value          | Permuted <i>P</i> Value | Nominal <i>P</i> Value          | Permuted <i>P</i> Value | Nominal <i>P</i> Value           | Permuted <i>P</i> Value |
| rs7138803  | 0.048                           | 0.23                    | 0.024                           | 0.13                    | 0.057                            | 0.26                    |
| rs1805081  | 0.17                            | 0.46                    | 0.078                           | 0.32                    | 0.053                            | 0.24                    |
| rs6499640  | 0.13                            | 0.42                    | 0.13                            | 0.41                    | 0.31                             | 0.50                    |
| rs17782313 | 0.0035                          | 0.020                   | 0.00099                         | 0.0059                  | 0.011                            | 0.062                   |
| rs6265     | 0.24                            | 0.49                    | 0.044                           | 0.21                    | 0.016                            | 0.088                   |
| rs10938397 | 0.0053                          | 0.031                   | 0.00082                         | 0.0047                  | 0.0039                           | 0.023                   |

Nominal *P* Values were adjusted for age and sex, and permuted *P* Values were further corrected for multiple testing. All *P* values and 95% CIs were one-sided. ANCOVA was applied for comparison of fat mass percentage between genotypes of SNPs, and linear regression was used to estimate the effect of per allele on fat mass percentage.

**Online Appendix Table 5D. Associations of six SNPs (rs7138803, rs1805081, rs6499640, rs17782313, rs6265, and rs10938397) with birth weight after sex adjustment**

| SNP        | Position | Nearest gene  | Effect allele (1) | Other allele (2) | Birth weight, g (mean±SE) |         |         | Per effect allele change in birth weight (β) | Lower bound of one-sided 95% CI |
|------------|----------|---------------|-------------------|------------------|---------------------------|---------|---------|----------------------------------------------|---------------------------------|
|            |          |               |                   |                  | 11                        | 12      | 22      |                                              |                                 |
| rs7138803  | 48533735 | <i>FAIM2</i>  | A                 | G                | 3416±32                   | 3352±15 | 3345±13 | 24.10                                        | 0.13                            |
| rs1805081  | 19394430 | <i>NPC1</i>   | A                 | G                | 3360±12                   | 3341±16 | 3371±40 | 7.60                                         | -19.88                          |
| rs6499640  | 52327178 | <i>FTO</i>    | A                 | G                | 3367±55                   | 3360±18 | 3351±11 | 8.20                                         | -21.43                          |
| rs17782313 | 56002077 | <i>MC4R</i>   | C                 | T                | 3323±39                   | 3345±16 | 3363±12 | (-19.30)                                     | -45.15                          |
| rs6265     | 27636492 | <i>BDNF</i>   | G                 | A                | 3357±18                   | 3367±13 | 3323±20 | 14.80                                        | -6.39                           |
| rs10938397 | 45023455 | <i>GNPDA2</i> | G                 | A                | 3359±28                   | 3341±14 | 3367±14 | (-11.90)                                     | -33.51                          |

| SNP        | <i>P</i> Value (Dominant model) |                         | <i>P</i> Value (Additive model) |                         | <i>P</i> Value (Recessive model) |                         |
|------------|---------------------------------|-------------------------|---------------------------------|-------------------------|----------------------------------|-------------------------|
|            | Nominal <i>P</i> Value          | Permuted <i>P</i> Value | Nominal <i>P</i> Value          | Permuted <i>P</i> Value | Nominal <i>P</i> Value           | Permuted <i>P</i> Value |
| rs7138803  | 0.014                           | 0.076                   | 0.014                           | 0.075                   | 0.12                             | 0.41                    |
| rs1805081  | 0.25                            | 0.49                    | 0.18                            | 0.46                    | 0.16                             | 0.45                    |
| rs6499640  | 0.23                            | 0.49                    | 0.13                            | 0.41                    | 0.059                            | 0.26                    |
| rs17782313 | 0.13                            | 0.42                    | 0.053                           | 0.24                    | 0.032                            | 0.16                    |
| rs6265     | 0.060                           | 0.27                    | 0.068                           | 0.29                    | 0.20                             | 0.48                    |
| rs10938397 | 0.18                            | 0.47                    | 0.17                            | 0.46                    | 0.28                             | 0.50                    |

Nominal *P* Values were adjusted for age and sex, and permuted *P* Values were further corrected for multiple testing. All *P* values and 95% CIs were one-sided. ANCOVA was applied for comparison of birth weight between genotypes of SNPs, and linear regression was used to estimate the effect of per allele on birth weight.

**Online Appendix Table 6. Associations of six SNPs (rs7138803, rs1805081, rs6499640, rs17782313, rs6265, and rs10938397) with overweight and obesity in multinomial logistic regression with age and sex as covariates under different genetic models**

| Overweight (n=655) vs. normal weight (n=1619) |      |               |               |              |                     |                                 |                 |                  |                     |                                 |                 |                  |                      |                                 |                 |                  |
|-----------------------------------------------|------|---------------|---------------|--------------|---------------------|---------------------------------|-----------------|------------------|---------------------|---------------------------------|-----------------|------------------|----------------------|---------------------------------|-----------------|------------------|
| SNP                                           | Chr. | Nearest gene  | Effect allele | Other allele | OR (Dominant model) | Lower bound of one-sided 95% CI | Nominal P Value | Permuted P Value | OR (Additive model) | Lower bound of one-sided 95% CI | Nominal P Value | Permuted P Value | OR (Recessive model) | Lower bound of one-sided 95% CI | Nominal P Value | Permuted P Value |
| rs7138803                                     | 12   | <i>FAIM2</i>  | A             | G            | 1.09                | 0.93                            | 0.15            | 0.44             | 1.12                | 0.99                            | 0.056           | 0.26             | 1.33                 | 1.02                            | 0.034           | 0.18             |
| rs1805081                                     | 18   | <i>NPC1</i>   | A             | G            | 0.97                | 0.70                            | 0.18            | 0.47             | 0.95                | 0.83                            | 0.20            | 0.48             | 0.93                 | 0.79                            | 0.41            | 0.50             |
| rs6499640                                     | 16   | <i>FTO</i>    | A             | G            | 1.02                | 0.86                            | 0.45            | 0.50             | 1.03                | 0.89                            | 0.38            | 0.50             | 1.12                 | 0.72                            | 0.28            | 0.50             |
| rs17782313                                    | 18   | <i>MC4R</i>   | C             | T            | 1.28                | 1.09                            | 0.0068          | 0.039            | 1.26                | 1.10                            | 0.0021          | 0.013            | 1.57                 | 1.11                            | 0.015           | 0.078            |
| rs6265                                        | 11   | <i>BDNF</i>   | G             | A            | 1.01                | 0.84                            | 0.12            | 0.40             | 1.05                | 0.94                            | 0.21            | 0.48             | 1.11                 | 0.94                            | 0.45            | 0.50             |
| rs10938397                                    | 4    | <i>GNPDA2</i> | G             | A            | 1.12                | 0.96                            | 0.10            | 0.38             | 1.12                | 1.00                            | 0.057           | 0.26             | 1.26                 | 0.98                            | 0.084           | 0.33             |

| Obese (n=1229) vs. normal weight (n=1619) |                     |                                 |                      |                  |       |                     |                                 |                      |                      |       |                      |                                 |                      |                  |       |  |
|-------------------------------------------|---------------------|---------------------------------|----------------------|------------------|-------|---------------------|---------------------------------|----------------------|----------------------|-------|----------------------|---------------------------------|----------------------|------------------|-------|--|
| SNP                                       | OR (Dominant model) | Lower bound of one-sided 95% CI | Nominal P Value      | Permuted P Value | Power | OR (Additive model) | Lower bound of one-sided 95% CI | Nominal P Value      | Permuted P Value     | Power | OR (Recessive model) | Lower bound of one-sided 95% CI | Nominal P Value      | Permuted P Value | Power |  |
| rs7138803                                 | 1.17                | 1.03                            | 0.027                | 0.14             | 0.41  | 1.15                | 1.04                            | 0.020                | 0.11                 | 0.636 | 1.23                 | 0.98                            | 0.098                | 0.36             | 0.190 |  |
| rs1805081                                 | 1.19                | 0.90                            | 0.052                | 0.24             | 0.42  | 1.12                | 1.01                            | 0.048                | 0.23                 | 0.994 | 1.14                 | 1.00                            | 0.19                 | 0.47             | 0.960 |  |
| rs6499640                                 | 1.22                | 1.06                            | 0.013                | 0.071            | 0.42  | 1.19                | 1.05                            | 0.016                | 0.088                | 0.512 | 1.21                 | 0.84                            | 0.25                 | 0.49             | 0.089 |  |
| rs17782313                                | 1.38                | 1.21                            | 3.0×10 <sup>-5</sup> | 0.00018          | 0.66  | 1.37                | 1.23                            | 8.2×10 <sup>-7</sup> | 5.0×10 <sup>-6</sup> | 0.766 | 1.97                 | 1.47                            | 4.4×10 <sup>-5</sup> | 0.00026          | 0.122 |  |
| rs6265                                    | 1.19                | 1.02                            | 0.0075               | 0.043            | 0.31  | 1.16                | 1.06                            | 0.0075               | 0.043                | 0.538 | 1.26                 | 1.09                            | 0.069                | 0.30             | 0.181 |  |
| rs10938397                                | 1.30                | 1.14                            | 0.00043              | 0.0026           | 0.67  | 1.24                | 1.13                            | 0.00014              | 0.00085              | 0.852 | 1.37                 | 1.12                            | 0.0073               | 0.041            | 0.226 |  |

Nominal *P* Values were adjusted for age and sex, and permuted *P* Values were further corrected for multiple testing. All *P* values and 95% CIs were one-sided. Obese, overweight, and normal weight children were diagnosed by the Chinese age- and sex-specific BMI cutoffs (online appendix Table 1) (Reference: Ji CY; Working Group on Obesity in China: Report on childhood obesity in China (1)--body mass index reference for screening overweight and obesity in Chinese school-age children. *Biomed Environ Sci* 18:390-400, 2005). ORs and 95% CIs were calculated using multinomial logistic regression with genotypes, age and sex as the independent variables.

**Online Appendix Table 7. Associations of the number of effect alleles with overweight and obesity after age and sex adjustment**

| No. of effect alleles | Obese | Overweight | Normal weight | Overweight |                                 |         | Obese |                                 |                       |
|-----------------------|-------|------------|---------------|------------|---------------------------------|---------|-------|---------------------------------|-----------------------|
|                       |       |            |               | OR         | Lower bound of one-sided 95% CI | P Value | OR    | Lower bound of one-sided 95% CI | P Value               |
| ≤3                    | 219   | 141        | 414           | 1          |                                 |         | 1     |                                 |                       |
| 4-6                   | 806   | 428        | 1025          | 1.22       | 1.01                            | 0.043   | 1.54  | 1.31                            | 5.9×10 <sup>-6</sup>  |
| ≥7                    | 172   | 75         | 141           | 1.56       | 1.17                            | 0.0054  | 2.50  | 1.97                            | 1.3×10 <sup>-10</sup> |

All *P* values and 95% CIs were one-sided. Obese, overweight, and normal weight children were diagnosed by the Chinese age- and sex-specific BMI cutoffs (online appendix Table 1) (Reference: Ji CY; Working Group on Obesity in China: Report on childhood obesity in China (1)--body mass index reference for screening overweight and obesity in Chinese school-age children. *Biomed Environ Sci* 18:390-400, 2005).

**Online Appendix Table 8. Associations between the number of effect alleles and anthropometric indices (mean±SE)**

| No. of effect alleles | BMI, kg/m <sup>2</sup> | Waist circumference, cm | Waist-to-height ratio | Fat mass percentage, % | Birth weight, g |
|-----------------------|------------------------|-------------------------|-----------------------|------------------------|-----------------|
| <b>Model 1*</b>       |                        |                         |                       |                        |                 |
| ≤3                    | 21.1±0.2               | 70.4±0.5                | 0.465±0.002           | 23.3±0.3               | 3345±20         |
| 4-6                   | 22.0±0.1               | 72.6±0.3                | 0.476±0.001           | 24.5±0.2               | 3363±12         |
| ≥7                    | 22.9±0.2               | 74.6±0.7                | 0.488±0.004           | 26.1±0.4               | 3327±28         |
| <i>P</i> Value        | 4.87×10 <sup>-9</sup>  | 1.98×10 <sup>-7</sup>   | 1.33×10 <sup>-7</sup> | 8.00×10 <sup>-7</sup>  | 0.211           |
| <b>Model 2†</b>       |                        |                         |                       |                        |                 |
| ≤3                    | 21.2±0.2               | 70.6±0.4                | 0.465±0.002           | 23.4±0.3               | 3343±20         |
| 4-6                   | 22.0±0.1               | 72.6±0.2                | 0.476±0.001           | 24.4±0.2               | 3363±12         |
| ≥7                    | 22.9±0.2               | 74.6±0.6                | 0.489±0.003           | 26.0±0.4               | 3329±28         |
| <i>P</i> Value        | 1.02×10 <sup>-9</sup>  | 9.30×10 <sup>-9</sup>   | 9.45×10 <sup>-9</sup> | 1.91×10 <sup>-6</sup>  | 0.217           |

All *P* values were one-sided. \*Unadjusted. †Adjusted for age and sex.
